# Supplementary material for: Burden of Severe Pneumonia, Pneumococcal Pneumonia and Pneumonia Deaths in Indian States: Modelling Based Estimates
Source: PLoS One. 2015 Jun 18;10(6):e0129191. doi: 10.1371/journal.pone.0129191 (PMC4472804; doi:10.1371/journal.pone.0129191)
Supplement: S1 File — (XLS) [file pone.0129191.s001.xls]

## Sheet: Meta
Severe Pneumonia (hospitalization) Children age less than 1year
Number	Name	Year	RR	95% CI Lower	95% CI upper	ln(RR)	SE(ln[RR])	Weights	Distance from pooled RR	Distance squared				0.43397
1	Gupta et al 2010	2010	0.0501713	0.04365	0.0574	-2.99231	0.0698574	204.916	-0.312402	0.0975952				Age	ALRI cases	Radiographic cases	Cohort Population
2	Gupta et al 2010	2010	0.118104	0.1008	0.138	-2.13619	0.0801315	155.738	0.543721	0.295632				Gupta et al 2010	205	88.9639	4086
3	Gupta et al 2010	2010	0.0573215	0.04734	0.06881	-2.85908	0.0954065	109.861	-0.17917	0.0321018				Gupta et al 2010	152	65.9634	1287
4	Broor et al 2007	2007	0.0632411	0.03744	0.1005	-2.7608	0.251892	15.7605	-0.0808913	0.0065434				Gupta et al 2010	110	47.7367	1919
5	Gladstone et al 2010	2008	0.0693069	0.04696	0.09883	-2.66921	0.189823	27.7526	0.0106991	0.000114472				Broor et al 2007	16	6.94352	253
								514.028						Gladstone et al 2010	28	12.1512	404
									Weighted Average and CI	Pooled	95% CI Lower	95% CI upper
									ln scale	-2.67991	-2.76636	-2.59346
									Natural scale	0.0685694	0.0628906	0.0747609
									SE(ln[pooled])	0.0441069
									Heterogeneity statistic	69.6729
									p-value	1.40963e-10
Clinical Pneumonia (no-hospitalization) Children age less than 1year
Number	Name	Year	RR	95% CI Lower	95% CI upper	ln(RR)	SE(ln[RR])	Weights	Distance from pooled RR	Distance squared
1	Broor et al 2007	2007	0.369565	0.3038	0.446	-0.995428	0.0979463	104.238	1.68448	2.83748
2	Gladstone et al 2010	2008	0.272277	0.2248	0.3269	-1.30093	0.0955212	109.597	1.37897	1.90157
								213.835
									Weighted Average and CI	Pooled	95% CI Lower	95% CI upper
									ln scale	-1.15201	-1.28604	-1.01798
									Natural scale	0.316001	0.276362	0.361326
									SE(ln[pooled])	0.068385
		`
									Heterogeneity statistic	504.179
									p-value	4.11935e-101
										#REF!
Radiographic Pneumonia among Severe Penumonia (hospitalization)
Number	Name	Year	RR	95% CI Lower	95% CI upper	ln(RR)	SE(ln[RR])	Weights	Distance from pooled RR	Distance squared
1	Gupta et al 2010	2010	0.0217728	0.0176	0.02668	-3.82709	0.106126	88.7878	-1.14718	1.31603
2	Gupta et al 2010	2010	0.0512536	0.03998	0.06483	-2.97097	0.123314	65.7625	-0.291059	0.0847154
5	Gupta et al 2010	2010	0.0248758	0.01865	0.03289	-3.69386	0.144725	47.7433	-1.01395	1.02809
4	Broor et al 2007	2007	0.0274447	0.0121	0.05473	-3.59558	0.385002	6.74644	-0.915671	0.838454
3	Gladstone et al 2010	2008	0.0300771	0.01609	0.0505	-3.50399	0.291779	11.746	-0.824081	0.679109
								220.786
									Weighted Average and CI	Pooled	95% CI Lower	95% CI upper
									ln scale	-3.51902	-3.65092	-3.38711
									Natural scale	0.0296286	0.0259671	0.0338063
									SE(ln[pooled])	0.0672999
		`
									Heterogeneity statistic	185.136
									p-value	8.9083e-34
Distribution of Pneumonia cases
Age Inter	Obs Dist	Exp Dist	Severe Pneumonia (hospitalization)	LB	UB	Clinical Pneumonia (no-hospitalization)	LB	UB	Radiographic Severe Pneumonia (hospitalization)	LB	UB
0	0.54	0.53141	0.0685694	0.0628906	0.0747609	0.316001	0.276362	0.361326	0.0296286	0.0259671	0.0338063
1	0.22	0.244625	0.0279357	0.0256221	0.0304582	0.128741	0.112592	0.147207	0.0120709	0.0105792	0.0137729
2	0.1	0.116447	0.012698	0.0116464	0.0138446	0.0585187	0.0511781	0.0669122	0.00548677	0.00480873	0.00626042
3	0.08	0.0557882	0.0101584	0.00931712	0.0110757	0.046815	0.0409425	0.0535297	0.00438942	0.00384698	0.00500834
4	0.06	0.0268076	0.00761882	0.00698784	0.00830677	0.0351112	0.0307069	0.0401473	0.00329206	0.00288524	0.00375625
We radiologic pneumonia cases attributable to S Pneumonia were 36.51%. The Philippines trialreported efficacy against radiologic pneumonia of 19.8% ((95% CI: -8.8, 40.8) in children age less than 1 year. The 11 serotypes contained in the vaccines accounts for 65.33% of IPD in the India. With vaccine efficacy against vaccine-type pneumococcal disease assumed to be 83% We estimated that 23.8% (=19.…
SeroPrev	VEIPD	VERadioPneum
0.6533	0.83	0.198	0.365153
0.365153

## Sheet: Model
State	Pop0_1	Pop1_2	Pop2_3	Pop3_4	Pop4_5	Pop0_5	LBW	Malutrition	NExBF	Solid Fuel	OverCrow	AccessToCare	LBW	Malutrition	NonExclBF	Solid Fuel		SevPneum0_1	SevPneum1_2	SevPneum2_3	SevPneum3_4	SevPneum4_5	SevPneum0_5	ClinPneum0_1	ClinPneum1_2	ClinPneum2_3	ClinPneum3_4	ClinPneum4_5	ClinPneum0_5	SevSPn0_1	SevSPn1_2	SevSPn2_3	SevSPn3_4	SevSPn4_5	SevSPn0_5	SevPneum0_1	LB	UB	SevPneum0_5	LB	UB	ClinPneum0_5	LB	UB	SevSPn0_1	LB	UB	SevSPn0_5	LB
India	20308167	21750367	23050936	23968625	23704030	112782125	21.5	42.5	57.2	70.8	3.3	0.7852	0.215	0.425	0.572	0.708	1	1.77346e+06	773830	372773	310091	230001	3.46015e+06	8.17295e+06	3.56618e+06	1.71792e+06	1.42905e+06	1.05996e+06	1.59461e+07	279818	122096	58816.6	48926.5	36289.8	545947	1.77346e+06	1.62658e+06	1.93359e+06	3.46015e+06	3.17359e+06	3.77259e+06	1.59461e+07	1.39458e+07	1.82332e+07	279818	671606	874355	545947	478479
Delhi	254697	271648	281664	285599	287592	1381200	26.5	26.1	45.5	9.3	3.1	0.891	0.265	0.261	0.455	0.093	0.2915	5713.66	2482.71	1170.11	949.17	716.845	11032.5	26331.3	11441.5	5392.46	4374.24	3303.57	50843.2	901.509	391.725	184.622	149.761	113.105	1740.72	5713.66	5240.47	6229.59	11032.5	10118.8	12028.7	50843.2	44465.4	58135.7	901.509	2163.76	2816.97	1740.72	1525.61
Haryana	466734	468526	474646	477000	475613	2362519	32.7	39.6	53.9	69.1	3.3	0.881	0.327	0.396	0.539	0.691	0.9783	35538.2	14534.1	6692.71	5380.73	4023.81	66169.6	163777	66980.3	30843.3	24797	18543.7	304942	5607.26	2293.21	1055.98	848.977	634.881	10440.3	35538.2	32595	38747.2	66169.6	60689.5	72144.5	304942	266690	348680	5607.26	13458.3	17521.2	10440.3	9150.12
Himachal Pradesh	101835	113916	107317	110322	111594	544984	24.8	36.5	21.7	68.9	2.5	0.839	0.248	0.365	0.217	0.689	0.6305	5247.47	2391.48	1024.07	842.193	638.927	10144.1	24182.9	11021.1	4719.39	3881.23	2944.49	46749.1	827.952	377.331	161.578	132.882	100.811	1600.55	5247.47	4812.89	5721.3	10144.1	9304.02	11060.1	46749.1	40884.9	53454.5	827.952	1987.21	2587.13	1600.55	1402.76
Jammu & Kashmir	275312	274393	285931	286440	292808	1414884	19.4	25.6	36.6	59.5	2.9	0.841	0.194	0.256	0.366	0.595	0.5806	13032.8	5291.92	2506.56	2008.82	1540.11	24380.2	60061.3	24387.7	11551.5	9257.62	7097.57	112356	2056.32	834.965	395.488	316.954	243	3846.73	13032.8	11953.4	14209.6	24380.2	22361	26581.6	112356	98261.7	128471	2056.32	4935.49	6425.45	3846.73	3371.36
Punjab	419950	424623	418369	433177	437410	2133529	27.7	24.9	62.9	54.9	3.1	0.928	0.277	0.249	0.629	0.549	0.8081	25075.2	10329.5	4626.08	3831.85	2901.97	46764.6	115559	47603.4	21319.2	17659	13373.7	215514	3956.4	1629.8	729.908	604.594	457.877	7378.58	25075.2	22998.5	27339.4	46764.6	42891.7	50987.3	215514	188480	246426	3956.4	9495.96	12362.7	7378.58	6466.75
Rajasthan	1357306	1369950	1547358	1528130	1499426	7302170	27.5	39.9	71.6	77.2	3.6	0.757	0.275	0.399	0.716	0.772	1.184	145567	59857.6	30731.4	24279.7	17867.7	278304	670845	275853	141625	111892	82343	1.28256e+06	22967.8	9444.41	4848.84	3830.87	2819.18	43911.1	145567	133512	158711	278304	255255	303433	1.28256e+06	1.12167e+06	1.46652e+06	22967.8	55126.1	71768	43911.1	38484.6
Uttaranchal	172766	177018	184772	193915	196393	924864	24.6	38	44.9	61.7	3	0.69	0.246	0.38	0.449	0.617	0.7929	13613.1	5682.58	2696.14	2263.64	1719.42	25974.9	62735.9	26188.1	12425.1	10431.9	7923.94	119705	2147.89	896.604	425.399	357.159	271.293	4098.35	13613.1	12485.7	14842.3	25974.9	23823.7	28320.3	119705	104689	136875	2147.89	5155.27	6711.59	4098.35	3591.88
Chhattisgarh	498242	468402	504467	547284	522670	2541065	17.5	47.1	23.3	86.7	3	0.744	0.175	0.471	0.233	0.867	0.8429	38705.6	14824.5	7257.25	6298.57	4511.47	71597.4	178374	68318.6	33444.9	29026.9	20791.1	329956	6107.01	2339.03	1145.06	993.796	711.825	11296.7	38705.6	35500.1	42200.6	71597.4	65667.8	78062.4	329956	288566	377282	6107.01	14657.8	19082.8	11296.7	9900.69
Madhya Pradesh	1410287	1445277	1513349	1562682	1539691	7471286	23.4	60	58.1	80.3	3.6	0.684	0.234	0.6	0.581	0.803	1.2317	174135	72704.1	34603.8	28585.5	21123.7	331152	802499	335056	159471	131736	97348.3	1.52611e+06	27475.2	11471.3	5459.83	4510.25	3332.92	52249.6	174135	159714	189859	331152	303727	361054	1.52611e+06	1.33468e+06	1.745e+06	27475.2	65944.8	85852.7	52249.6	45792.7
Uttar Pradesh	3500559	3638740	4191583	4546132	4499654	20376668	25.1	42.4	86	81.7	3.8	0.766	0.251	0.424	0.86	0.817	1.36	426165	180476	94498.4	81993.3	60866.3	843999	1.96397e+06	831723	435495	377865	280501	3.88956e+06	67240.8	28475.8	14910.1	12937	9603.55	133167	426165	390871	464646	843999	774101	920209	3.88956e+06	3.40165e+06	4.44745e+06	67240.8	161388	210109	133167	116711
Bihar	2014957	2330590	2801985	2835798	2781699	12765029	27.6	55.9	90.6	89.7	3.3	0.788	0.276	0.559	0.906	0.897	1.5834	277626	130825	71493.5	57885	42585.5	580415	1.27944e+06	602903	329477	266762	196255	2.67483e+06	43804.2	20641.6	11280.3	9133.16	6719.19	91578.5	277626	254634	302695	580415	532346	632824	2.67483e+06	2.3393e+06	3.05849e+06	43804.2	105137	136876	91578.5	80261.4
Jharkhand	625189	682388	759463	811016	770241	3648297	19.1	56.5	66.3	89.1	3.2	0.621	0.191	0.565	0.663	0.891	1.3307	91860.7	40848.8	20664.8	17654	12574.8	183603	423339	188251	95233.5	81358.4	57951	846133	14493.9	6445.16	3260.52	2785.48	1984.07	28969.1	91860.7	84253	100155	183603	168398	200182	846133	739994	967496	14493.9	34787.5	45289.5	28969.1	25389.2
Orissa	670909	769827	707887	750616	753790	3653029	20.6	40.7	42.1	88.6	3.1	0.668	0.206	0.407	0.421	0.886	0.9885	68076	31823.8	13301.5	11283.5	8498.42	132983	313727	146660	61299.8	51999.9	39164.8	612851	10741.1	5021.2	2098.73	1780.33	1340.89	20982.2	68076	62438.1	74223	132983	121970	144991	612851	535975	700754	10741.1	25780.3	33563	20982.2	18389.3
West Bengal	1282793	1399278	1507433	1584098	1559541	7333143	22.9	38.7	47.8	79.2	3.1	0.819	0.229	0.387	0.478	0.792	0.9578	102867	45714.5	22385.4	18819.1	13895.5	203682	474063	210675	103163	86727.7	64037.4	938665	16230.5	7212.89	3532	2969.3	2192.45	32137.2	102867	94348.1	112156	203682	186813	222074	938665	820919	1.0733e+06	16230.5	38955.7	50716	32137.2	28165.7
Arunachal Pradesh	23229	30140	28930	29950	30630	142879	14.1	32.5	16.7	67.7	2.7	0.808	0.141	0.325	0.167	0.677	0.5011	987.811	522.174	227.823	188.684	144.726	2071.22	4552.31	2406.43	1049.92	869.55	666.969	9545.18	155.858	82.3892	35.9462	29.7709	22.8351	326.799	987.811	906.002	1077.01	2071.22	1899.68	2258.24	9545.18	8347.83	10914.3	155.858	374.083	487.014	326.799	286.414
Assam	548850	626156	669558	691614	676655	3212833	19.4	36.4	32.7	75.8	2.7	0.66	0.194	0.364	0.327	0.758	0.7623	43467.6	20203.4	9819.89	8114.69	5954.38	87559.9	200320	93106.9	45254.8	37396.4	27440.7	403519	6858.37	3187.71	1549.39	1280.35	939.49	13815.3	43467.6	39867.7	47392.6	87559.9	80308.4	95466.3	403519	352901	461396	6858.37	16461.1	21430.5	13815.3	12108
Manipur	41111	53574	43835	46763	46746	232029	13.1	22.1	37.5	64.7	2.6	0.531	0.131	0.221	0.375	0.647	0.5771	3063.69	1626.56	604.942	516.28	387.069	6198.54	14119	7495.97	2787.87	2379.27	1783.8	28565.9	483.392	256.64	95.4485	81.4592	61.0722	978.012	3063.69	2809.96	3340.33	6198.54	5685.19	6758.24	28565.9	24982.6	32663.1	483.392	1160.22	1510.47	978.012	857.152
Meghalaya	81293	86262	78719	79413	80467	406154	18	48.8	31.2	72.2	2.9	0.826	0.18	0.488	0.312	0.722	0.8136	5490.53	2373.61	984.57	794.6	603.86	10247.2	25303	10938.8	4537.38	3661.91	2782.88	47223.9	866.302	374.511	155.347	125.373	95.2777	1616.81	5490.53	5035.81	5986.3	10247.2	9398.52	11172.5	47223.9	41300.2	53997.4	866.302	2079.26	2706.96	1616.81	1417.01
Mizoram	23899	28745	22656	23235	22698	121233	7.6	19.9	23.3	34.1	3.5	0.594	0.076	0.199	0.233	0.341	0.1649	454.929	222.923	79.8645	65.5244	48.0075	871.249	2096.54	1027.34	368.054	301.968	221.242	4015.14	71.7793	35.1731	12.6011	10.3385	7.57468	137.467	454.929	417.253	496.008	871.249	799.094	949.92	4015.14	3511.48	4591.04	71.7793	172.281	224.291	137.467	120.479
Nagaland	33464	40143	40173	40812	42670	197262	11	25.2	53.8	76	2.6	0.594	0.11	0.252	0.538	0.76	0.8306	3208.58	1568.1	713.306	579.722	454.586	6524.3	14786.7	7226.58	3287.26	2671.64	2094.95	30067.1	506.254	247.417	112.546	91.4692	71.725	1029.41	3208.58	2942.85	3498.31	6524.3	5983.97	7113.42	30067.1	26295.5	34379.7	506.254	1215.09	1581.91	1029.41	902.199
Sikkim	7649	8222	8230	8715	9520	42336	10.3	19.7	12.3	52.4	2.3	0.555	0.103	0.197	0.123	0.524	0.2215	209.322	91.6679	41.7078	35.3325	28.9471	406.978	964.659	422.45	192.21	162.829	133.402	1875.55	33.0271	14.4635	6.5807	5.5748	4.56731	64.2134	209.322	191.987	228.223	406.978	373.272	443.726	1875.55	1640.28	2144.57	33.0271	79.2701	103.201	64.2134	56.278
Tripura	56275	64108	65012	69528	67643	322566	27.3	39.6	36.4	80.4	2.9	0.737	0.273	0.396	0.364	0.804	0.8896	4657.71	2161.72	996.454	852.537	622.068	9290.49	21465	9962.24	4592.14	3928.91	2866.79	42815.1	734.9	341.078	157.222	134.514	98.1506	1465.86	4657.71	4271.97	5078.29	9290.49	8521.07	10129.4	42815.1	37444.4	48956.2	734.9	1763.87	2296.36	1465.86	1284.72
Goa	19039	21181	20366	19928	20689	101203	22.2	25	38.3	33.3	2.7	0.821	0.222	0.25	0.383	0.333	0.3927	624.442	283.024	123.697	96.8295	75.3954	1203.39	2877.73	1304.31	570.057	446.237	347.459	5545.8	98.5251	44.6558	19.5171	15.2779	11.896	189.872	624.442	572.727	680.827	1203.39	1103.73	1312.05	5545.8	4850.13	6341.24	98.5251	236.475	307.864	189.872	166.408
Gujarat	960867	1119545	1116718	1123762	1139440	5460332	22	44.6	57.3	52.3	3.6	0.795	0.22	0.446	0.573	0.523	0.8717	72242.6	34292.6	15548.2	12517	9518.73	144119	332929	158037	71653.6	57684.5	43866.9	664171	11398.5	5410.73	2453.21	1974.95	1501.88	22739.3	72242.6	66259.6	78765.8	144119	132183	157133	664171	580857	759435	11398.5	27358.2	35617.3	22739.3	19929.2
Maharashtra	1775560	1926342	1888543	1895221	1876360	9362026	22.1	37	32.2	48.1	3.5	0.846	0.221	0.37	0.322	0.481	0.5518	79410.3	35099.7	15641.4	12557.3	9324.28	152033	365961	161757	72083	57870.3	42970.8	700642	12529.4	5538.07	2467.91	1981.31	1471.19	23987.9	79410.3	72833.7	86580.8	152033	139442	165761	700642	612753	801137	12529.4	30072.6	39151.1	23987.9	21023.6
Andhra Pradesh	1214847	1260326	1181570	1319621	1308401	6284765	19.4	32.5	42.7	66.3	3.2	0.801	0.194	0.325	0.427	0.663	0.7451	77487.9	32751	13956.5	12469.7	9272.79	145938	357102	150932	64318.5	57466.6	42733.5	672553	12226.1	5167.48	2202.08	1967.49	1463.07	23026.2	77487.9	71070.5	84484.7	145938	133852	159116	672553	588188	769019	12226.1	29344.6	38203.3	23026.2	20180.7
Karnataka	933645	1017674	1010479	1042923	1041998	5046719	18.7	37.6	29.2	63.8	3.4	0.809	0.187	0.376	0.292	0.638	0.6416	50772.4	22546.7	10176.1	8402.23	6296.08	98193.5	233984	103906	46896.2	38721.5	29015.4	452523	8010.93	3557.45	1605.59	1325.71	993.403	15493.1	50772.4	46567.5	55357	98193.5	90061.3	107060	452523	395759	517430	8010.93	19227.4	25032	15493.1	13578.5
Kerala	482341	500354	482851	486817	500729	2453092	16.1	22.9	10.8	71.4	2.2	0.898	0.161	0.229	0.108	0.714	0.4088	15056.3	6363.13	2791.16	2251.26	1736.7	28198.6	69386.8	29324.4	12863	10374.9	8003.56	129953	2375.6	1003.98	440.392	355.207	274.019	4449.2	15056.3	13809.4	16415.9	28198.6	25863.2	30744.8	129953	113651	148592	2375.6	5701.81	7423.12	4449.2	3899.38
Tamil Nadu	1004971	1078713	1053548	1084158	1057311	5278701	17.2	29.8	20.6	60.5	2.9	0.846	0.172	0.298	0.206	0.605	0.4694	38234.6	16720.1	7422.73	6110.71	4469.54	72957.6	176204	77054.1	34207.5	28161.1	20597.8	336224	6032.7	2638.11	1171.17	964.155	705.209	11511.3	38234.6	35068.1	41687	72957.6	66915.4	79545.4	336224	294048	384450	6032.7	14479.4	18850.5	11511.3	10088.8
India	20258576	21696061	22997412	23914669	23650079	112516797	21.5	42.5	57.2	70.8	3.3	0.7852	0.215	0.425	0.572	0.708	1	1.81859e+06	794613	392780	327628	242402	3.57601e+06	8.38096e+06	3.66196e+06	1.81012e+06	1.50987e+06	1.11711e+06	1.648e+07	286940	125375	61973.3	51693.5	38246.4	564228	1.81859e+06	1.66798e+06	1.9828e+06	3.57601e+06	3.27986e+06	3.89892e+06	1.648e+07	1.44128e+07	1.88438e+07	286940	688699	896608	564228	494501
																		50.8553	22.2206	10.9837	9.16181	6.77854	100																									15.7781
100	LBW	Mal	NexBF	Solid Fuel														1.81859e+06					768128
1	1.4	1.8	1.9	1.8
	0.4	0.8	0.9	0.8
PneumMortAcc	0.0194547	0.0130347	0.0290368
SPMortAcc	0.167663	0.09773	0.3236
219003	ISPPD403
286940	Model
243698	ISPPD0276
[truncated: 7 more columns]

## Sheet: Scaling for MR
	MDS MR		99%CI		0.167663		0.0194547
India	0.135		(13·0–14·1)		0.167663		0.0194547
Delhi	0.087		(5·4–12·6)		0.108049		0.0125375
Haryana	0.109		(8·9–13·1)		0.135372		0.0157079
Himachal Pradesh	0.098		(6·3–14·1)		0.121711		0.0141227
Jammu & Kashmir	0.123		(9·4–15·3)		0.15276		0.0177254
Punjab	0.067		(4·5–9·6)		0.0832105		0.0096553
Rajasthan	0.218		(19·7–24·0)		0.270745		0.0314157
Uttaranchal	0.168		(15·4–18·2)		0.208647		0.0242103
Chhattisgarh	0.149		(11·5–18·7)		0.18505		0.0214722
Madhya Pradesh	0.201		(17·9–22·4)		0.249632		0.0289659
Uttar Pradesh	0.168		(15·4–18·2)		0.208647		0.0242103
Bihar	0.204		(18·5–22·5)		0.253357		0.0293982
Jharkhand	0.175		(13·6–21·9)		0.217341		0.0252191
Orissa	0.131		(10·8–15·7)		0.162695		0.0188783
West Bengal	0.073		(6·1–8·7)		0.0906622		0.0105199
Arunachal Pradesh	0.074				0.0919042		0.0106641
Assam	0.13		(10·3–16·2)		0.161453		0.0187342
Manipur	0.074				0.0919042		0.0106641
Meghalaya	0.074				0.0919042		0.0106641
Mizoram	0.074				0.0919042		0.0106641
Nagaland	0.074				0.0919042		0.0106641
Sikkim	0.074				0.0919042		0.0106641
Tripura	0.074				0.0919042		0.0106641
Goa	0.074				0.0919042		0.0106641
Gujarat	0.091		(7·5–11·0)		0.113017		0.0131139
Maharashtra	0.066		(5·0–8·5)		0.0819686		0.00951119
Andhra Pradesh	0.057		(3·1–10·1)		0.070791		0.00821421
Karnataka	0.072		(5·5–9·3)		0.0894203		0.0103758
Kerala	0.009		(0·3–2·2)		0.0111775		0.00129698
Tamil Nadu	0.02		(1·1–3·6)		0.024839		0.00288218
